# Supplementary material for: Efficient sampling of shiitake-inoculated oak logs to determine the log-to-mushroom transfer factor of stable cesium
Source: PeerJ. 2019 Oct 24;7:e7825. doi: 10.7717/peerj.7825 (PMC6815652; doi:10.7717/peerj.7825)
Supplement: Supplemental Information 1 [file peerj-07-7825-s001.xlsx]

## Sheet: Heartwood
		*raw data*
		Heartwood
Log ID	Disc number	Cs-133 (µg/kg DW)	Mean	Standard deviation	Minimum	Maximum
1	1	26.2913
	2	17.6134
	3	17.0682
	4	16.2876
	5	15.9971
	6	13.4903
	7	20.4241
	8	19.3723
	9	33.0018	19.9496	6.07918	13.4903	33.0018
2	1	72.5947
	2	44.4403
	3	46.2949
	4	39.4184
	5	53.5093
	6	51.678
	7	45.9927
	8	62.0097
	9	121.789	59.7474	25.3503	39.4184	121.789
3	1	20.4282
	2	20.8649
	3	37.3058
	4	32.1545
	5	26.6628
	6	22.9614
	7	25.2407
	8	27.1849
	9	38.7349	27.9487	6.73394	20.4282	38.7349
4	1	14.9205
	2	8.81787
	3	13.7049
	4	15.1309
	5	28.9647
	6	9.26343
	7	8.39723
	8	10.842
	9	11.732	13.5304	6.32425	8.39723	28.9647
5	1	11.443
	2	16.657
	3	10.1218
	4	15.5242
	5	13.7741
	6	14.7185
	7	10.3563
	8	12.306
	9	16.1716	13.4525	2.49232	10.1218	16.657

## Sheet: Sapwood
		*raw data*
		Sapwood
Log ID	Disc number	Cs-133 (µg/kg DW)	Mean	Standard deviation	Minimum	Maximum
1	1	30.8322
	2	25.9311
	3	21.3822
	4	21.5338
	5	21.7048
	6	18.3017
	7	23.9429
	8	26.6046
	9	32.9798	24.8015	4.77921	18.3017	32.9798
2	1	78.9274
	2	47.8495
	3	45.526
	4	44.6824
	5	46.6328
	6	47.7165
	7	41.4804
	8	76.571
	9	126.558	61.7716	28.06	41.4804	126.558
3	1	20.8312
	2	20.8306
	3	30.0149
	4	28.7164
	5	25.2561
	6	23.2243
	7	25.2939
	8	21.1882
	9	33.1505	25.3896	4.4247	20.8306	33.1505
4	1	17.094
	2	12.5613
	3	13.2985
	4	13.236
	5	10.1997
	6	10.1291
	7	10.8791
	8	13.3103
	9	23.5524	13.8067	4.2319	10.1291	23.5524
5	1	9.77377
	2	18.6775
	3	15.6041
	4	11.464
	5	15.1388
	6	17.197
	7	13.3083
	8	23.1234
	9	13.4108	15.2997	4.01746	9.77377	23.1234

## Sheet: Bark
		*raw data*
		Bark
Log ID	Disc number	Cs-133 (µg/kg DW)	Mean	Standard deviation	Minimum	Maximum
1	1	65.19
	2	69.3256
	3	78.8288
	4	72.1638
	5	77.5453
	6	71.7247
	7	86.565
	8	89.1175
	9	101.873	79.1482	11.5579	65.19	101.873
2	1	120.212
	2	102.416
	3	99.9865
	4	94.0667
	5	104.263
	6	113.909
	7	97.4032
	8	137.556
	9	250.757	124.508	49.2449	94.0667	250.757
3	1	70.4392
	2	59.7706
	3	73.6577
	4	63.2807
	5	59.8547
	6	51.6523
	7	42.3085
	8	47.6943
	9	54.0728	58.0812	10.2619	42.3085	73.6577
4	1	45.4794
	2	49.5856
	3	51.6997
	4	49.1063
	5	37.9371
	6	38.2761
	7	33.6536
	8	40.8486
	9	39.3549	42.8824	6.28075	33.6536	51.6997
5	1	52.7224
	2	57.1208
	3	50.4684
	4	61.0038
	5	56.0412
	6	51.4403
	7	47.6832
	8	43.5616
	9	41.6695	51.3013	6.31438	41.6695	61.0038

## Sheet: Sawdust
		*raw data*
		Sawdust
Log ID	Cut position	Cs-133 (µg/kg DW)	Mean	Standard deviation	Minimum	Maximum
1	1	30.0776
	2	24.2408
	3	27.0337
	4	27.9268
	5	23.7505
	6	24.1889
	7	29.6939
	8	31.0908	27.2504	2.92517	23.7505	31.0908
2	1	53.6567
	2	57.7664
	3	47.39
	4	51.3013
	5	48.3653
	6	52.0635
	7	49.8765
	8	92.9991	56.6774	15.0303	47.39	92.9991
3	1	24.5787
	2	25.1332
	3	30.3399
	4	27.0341
	5	22.3402
	6	26.1384
	7	23.7588
	8	25.289	25.5765	2.39591	22.3402	30.3399
4	1	14.3849
	2	15.5753
	3	17.5357
	4	14.9122
	5	12.7992
	6	11.7402
	7	13.7633
	8	13.7374	14.306	1.76828	11.7402	17.5357
5	1	22.7339
	2	20.6556
	3	19.3695
	4	26.5706
	5	27.949
	6	13.8402
	7	21.8962
	8	18.3392	21.4193	4.51734	13.8402	27.949
6	1	43.2084
	2	37.4265
	3	38.5242
	4	40.7415
	5	37.2392
	6	20.1785
	7	33.7491
	8	46.3558	37.1779	7.89137	20.1785	46.3558
7	1	11.2614
	2	16.5993
	3	15.1993
	4	12.817
	5	10.7646
	6	11.1717
	7	10.5225
	8	17.4146	13.2188	2.78854	10.5225	17.4146
8	1	15.4884
	2	12.1223
	3	6.85027
	4	6.31675
	5	15.3927
	6	9.0375
	7	9.76896
	8	9.74493	10.5902	3.49394	6.31675	15.4884
9	1	34.1703
	2	34.3952
	3	37.5911
	4	38.8484
	5	40.1353
	6	29.9874
	7	43.8827
	8	39.9285	37.3674	4.34959	29.9874	43.8827
10	1	23.854
	2	21.5317
	3	20.1707
	4	13.4533
	5	24.4982
	6	19.0876
	7	17.1353
	8	20.0563	19.9734	3.57287	13.4533	24.4982

## Sheet: Fruiting bodies
		*raw data*
		Fruiting bodies
Log ID	Disc number	Cs-133 (µg/kg DW)	Mean	Standard deviation	Minimum	Maximum
1	1	999.616
	2	720.901
	3	772.834
	4	792.158
	5	713.193
	6	741.779
	7	611.984
	8	670.44
	9	667.678	743.398	111.04	611.984	999.616
2	1	1204.45
	2	1140.8
	3	1148.74
	4	1092.25
	5	1211.43
	6	1331.29
	7	1199.5
	8	1343.35
	9	1619.85	1254.63	160.113	1092.25	1619.85
3	1	597.275
	2	887.353
	3	556.485
	4	562.778
	5	576.344
	6	539.456
	7	619.128
	8	601.807
	9	612.367	616.999	104.884	539.456	887.353
4	1	458.01
	2	427.049
	3	439.617
	4	382.204
	5	366.215
	6	357.136
	7	266.551
	8	332.506
	9	431.481	384.53	61.4034	266.551	458.01
5	1	371.565
	2	327.023
	3	427.279
	4	413.297
	5	367.754
	6	387.268
	7	410.319
	8	379.588
	9	365.471	383.285	30.5324	327.023	427.279
6	1	776.359
	2	702.876
	3	753.435
	4	745.136
	5	761.233
	6	712.567
	7	791.233
	8	710.337
	9	No fruiting body	744.147	32.6835	702.876	791.233
7	1	330.461
	2	348.997
	3	356.942
	4	320.834
	5	309.737
	6	332.111
	7	368.169
	8	411.522
	9	No fruiting body	347.346	32.2522	309.737	411.522
8	1	280.238
	2	324.294
	3	265.897
	4	247.948
	5	210.636
	6	231.533
	7	279.356
	8	220.265
	9	No fruiting body	257.521	37.5591	210.636	324.294
9	1	1026.34
	2	924.326
	3	942.945
	4	689.037
	5	822.512
	6	850.673
	7	774.892
	8	854.254
	9	1086.38	885.707	123.483	689.037	1086.38
10	1	342.071
	2	301.944
	3	296.911
	4	274.45
	5	250.695
	6	274.792
	7	292.072
	8	343.599
	9	No fruiting body	297.067	32.5084	250.695	343.599
